# Supplementary material for: Validation of biofilm formation on human skin wound models and demonstration of clinically translatable bacteria-specific volatile signatures
Source: PubMed Central journal article supplement (PMC6013498; doi:10.1038/s41598-018-27504-z), 2018-06-21
Supplement: 41598_2018_27504_MOESM1_ESM.pdf [file 41598_2018_27504_MOESM1_ESM.pdf]

## **Supplementary Information**

### **Validation of biofilm formation on human skin wound models and demonstration of clinically translatable bacteria-specific volatile signatures**

Mohammed Ashrafi, Lilyann Novak-Frazer, Matthew Bates, Mohamed Baguneid, Teresa

Alonso-Rasgado, Guoqing Xia, Riina Rautemaa-Richardson, Ardeshir Bayat\*

\*SI correspondence to: [ardeshir.bayat@manchester.ac.uk](mailto:ardeshir.bayat@manchester.ac.uk)

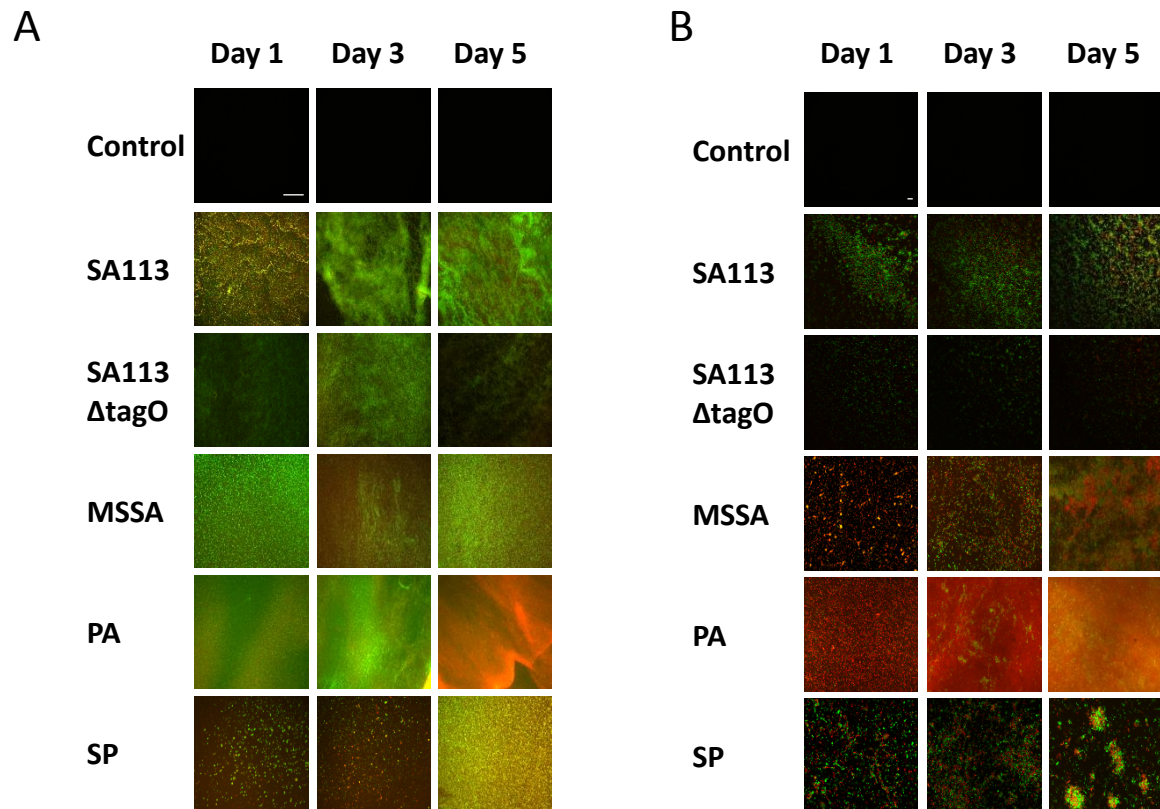

**Figure S1. *In vitro* model of biofilm formation.** Aerial view of biofilms on coverslips showing viable bacteria stained green with the nucleic acid stain SYTO<sup>®</sup> 9 and dead cells and extracellular DNA stained red with the nucleic acid stain propidium iodide (PI). **(A)** Stereo-fluorescence microscopy. Scale bar: 250 $\mu$ m. **(B)** Wide-field fluorescence microscopy. Scale bar: 10 $\mu$ m is equal in all images.

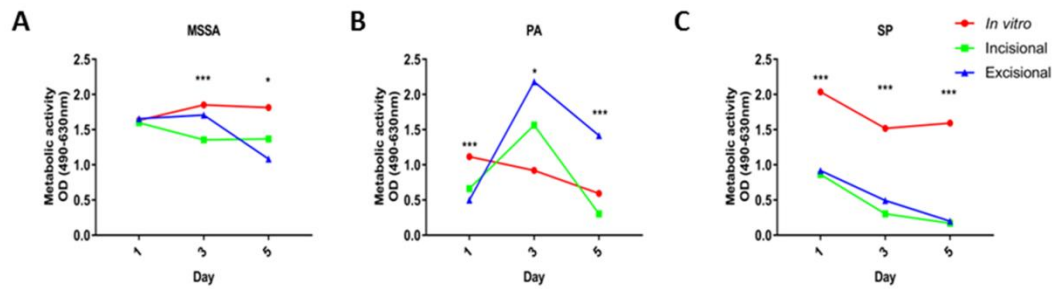

**Figure S2. Inter-model comparisons of metabolic activity of biofilms.** Inter-model comparisons of metabolic activity of MSSA (**A**), PA (**B**) and SP (**C**) biofilms following XTT reduction assay. Mean  $\pm$  standard error of the mean (n=6), \*  $P < 0.05$ , \*\*  $P < 0.01$ , \*\*\*  $P < 0.001$ , as determined by one-way analysis of variances with accompanying Tukey post hoc analyses.

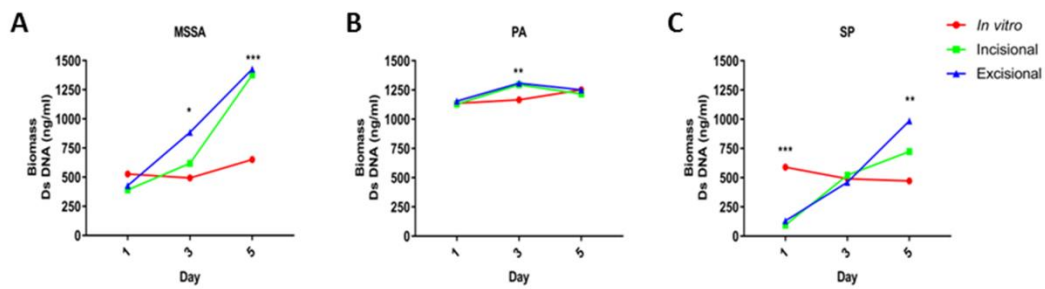

**Figure S3. Inter-model comparisons of biomass of biofilms.** Inter-model comparisons of biomass of MSSA (A), PA (B) and SP (C) biofilms following Quant-iT PicoGreen dsDNA reagent assay. Mean  $\pm$  standard error of the mean (n=6), \*  $P < 0.05$ , \*\*  $P < 0.01$ , \*\*\*  $P < 0.001$ , as determined by one-way analysis of variances with accompanying Tukey post hoc analyses.

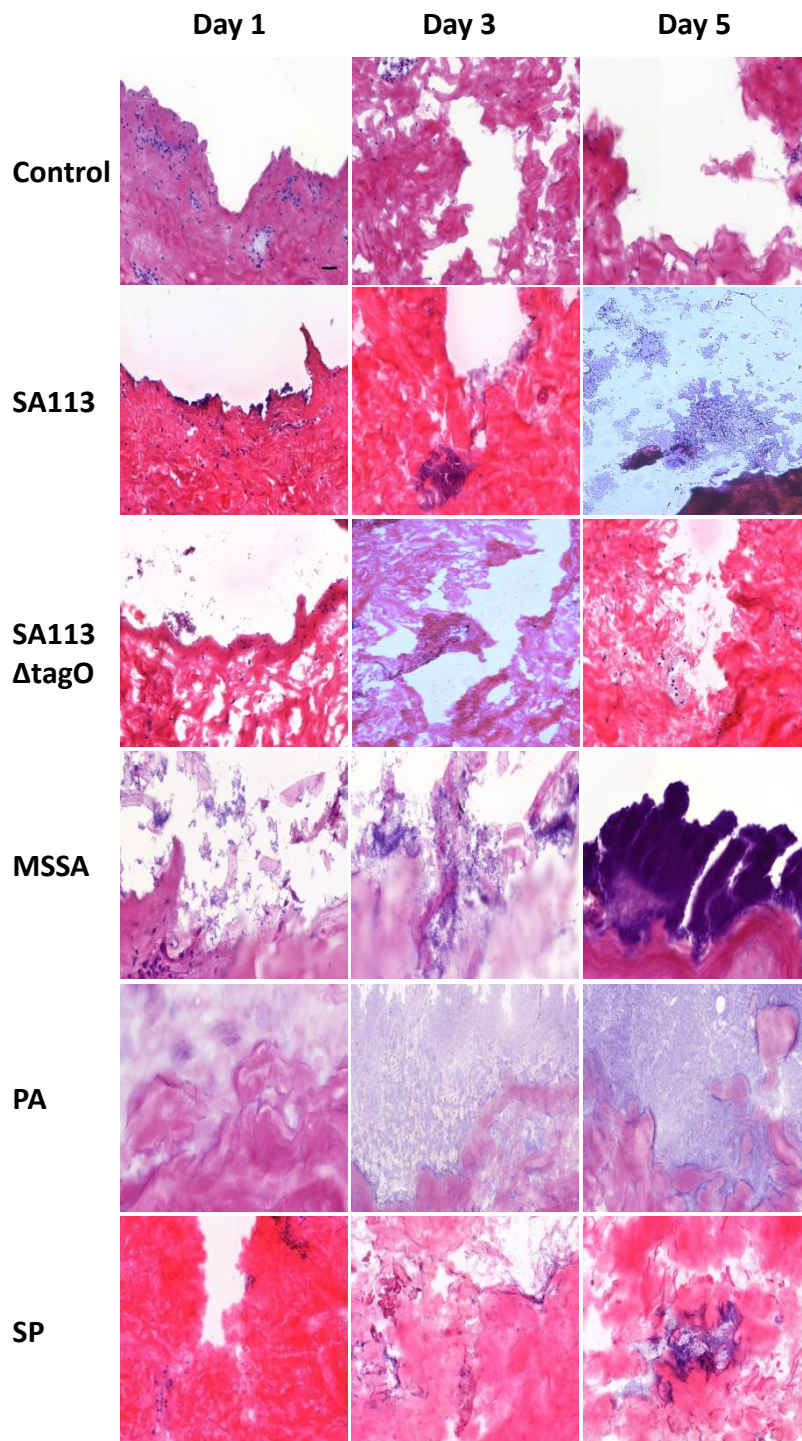

**Figure S4. Haematoxylin and eosin stained microscopy of biofilms of *ex vivo* incisional wound model.** Wound tissue is stained pink and biofilm material blue or purple. Scale bar: 20  $\mu\text{m}$  is equal in all images.

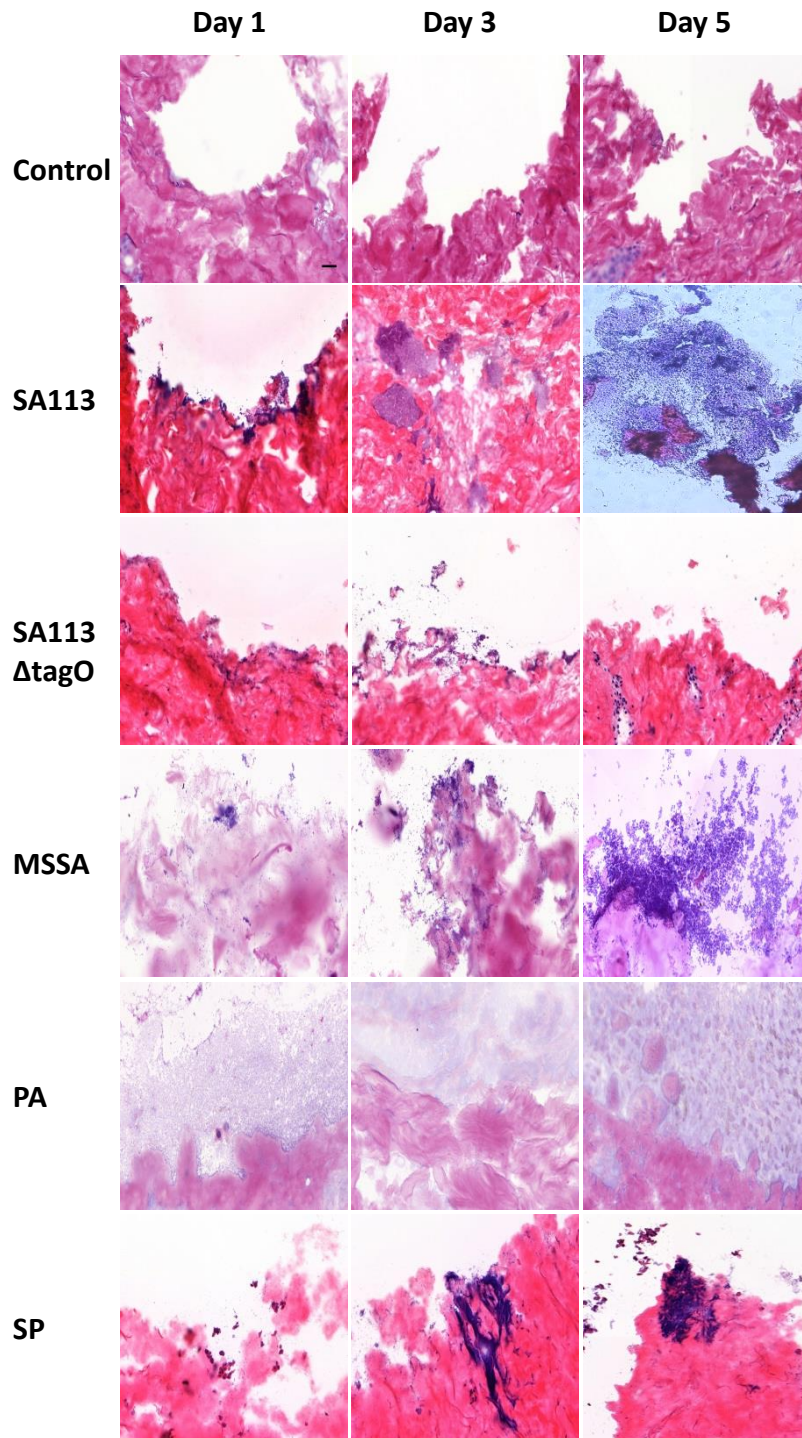

**Figure S5. Haematoxylin and eosin stained microscopy of biofilms of *ex vivo* excisional wound model.** Wound tissue is stained pink and biofilm material blue or purple. Scale bar: 20  $\mu$ m is equal in all images.

A

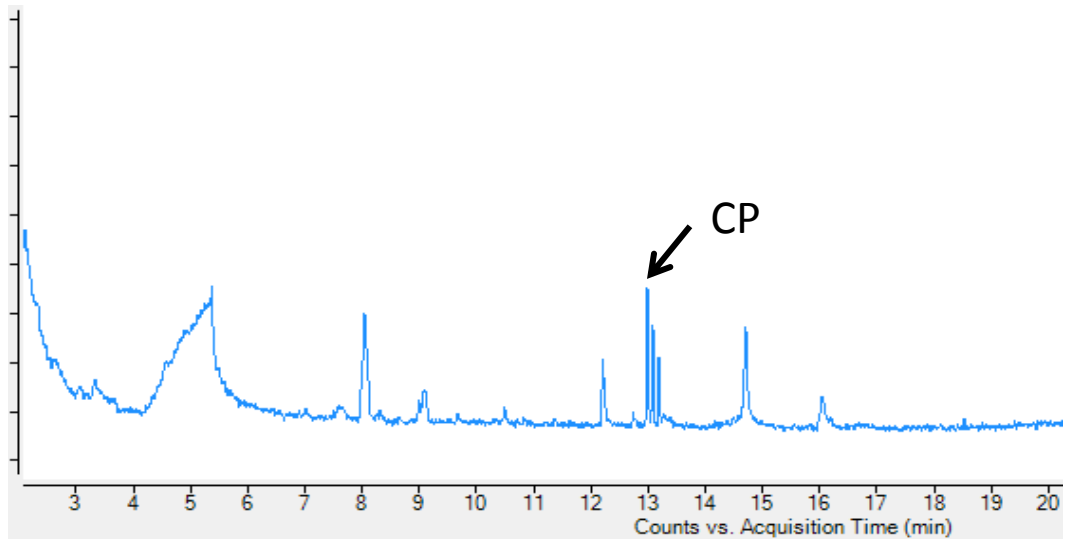

B

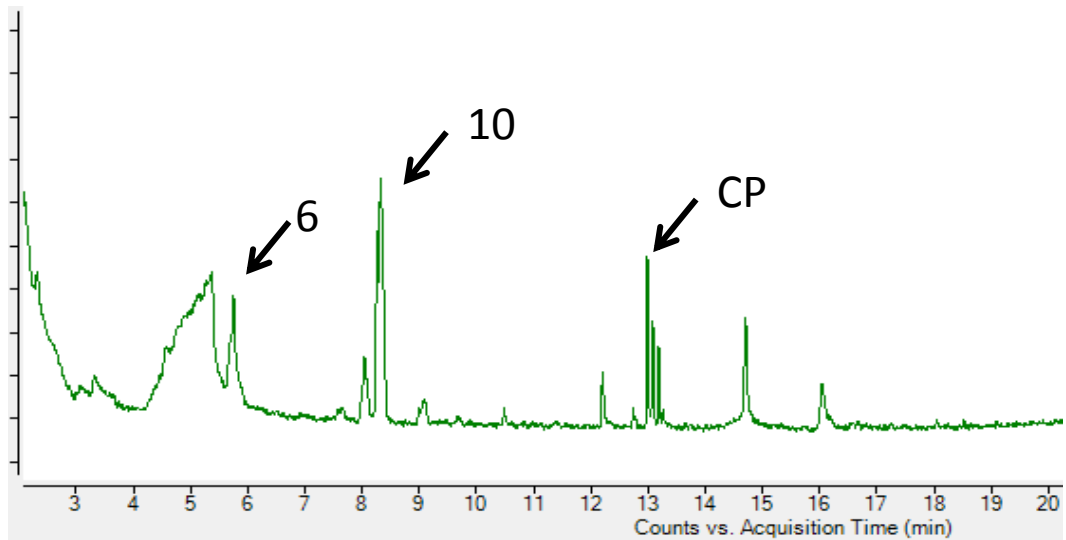

**Figure S6. Representative chromatograms at day 1 of (A) *ex vivo* excisional cutaneous wound explant control and (B) *ex vivo* excisional cutaneous wound explant inoculated with MSSA. 6 - 2-methyl-1-propanol; 10 - 3-methyl-1-butanol; CP – common peak.**

Snapshots of chromatograms up to 20 min after which there were no further peaks. Non-labelled peaks were shared between inoculated and control samples.

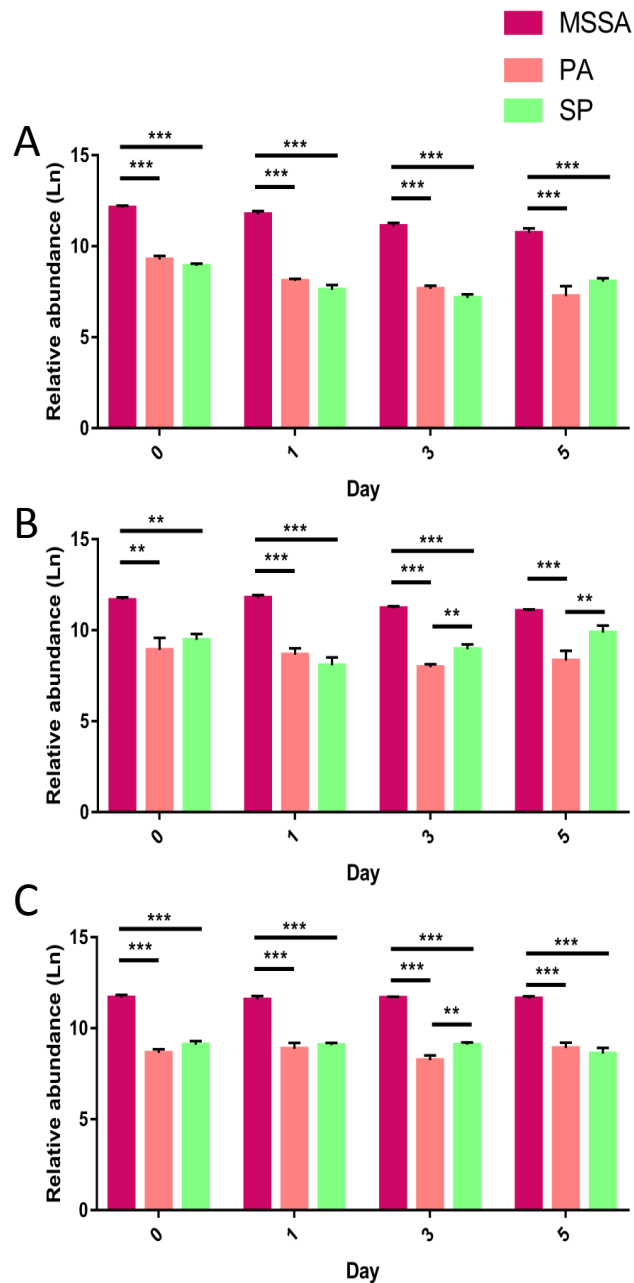

**Figure S7. The presence of 2-methyl-1-propanol among bacterial species and in different wound models. (A) *in vitro*; (B) *ex vivo* incisional and (C) *ex vivo* excisional wound model.** Relative abundance of 2-methyl-1-propanol on days 0, 1, 3 and 5 produced by MSSA (pink), PA (peach) and SP (green) biofilms. Mean  $\pm$  standard error of the mean (n=6), \* P < 0.05, \*\* P < 0.01, \*\*\* P < 0.001, as determined by one-way analysis of variances with accompanying Tukey post hoc analyses.



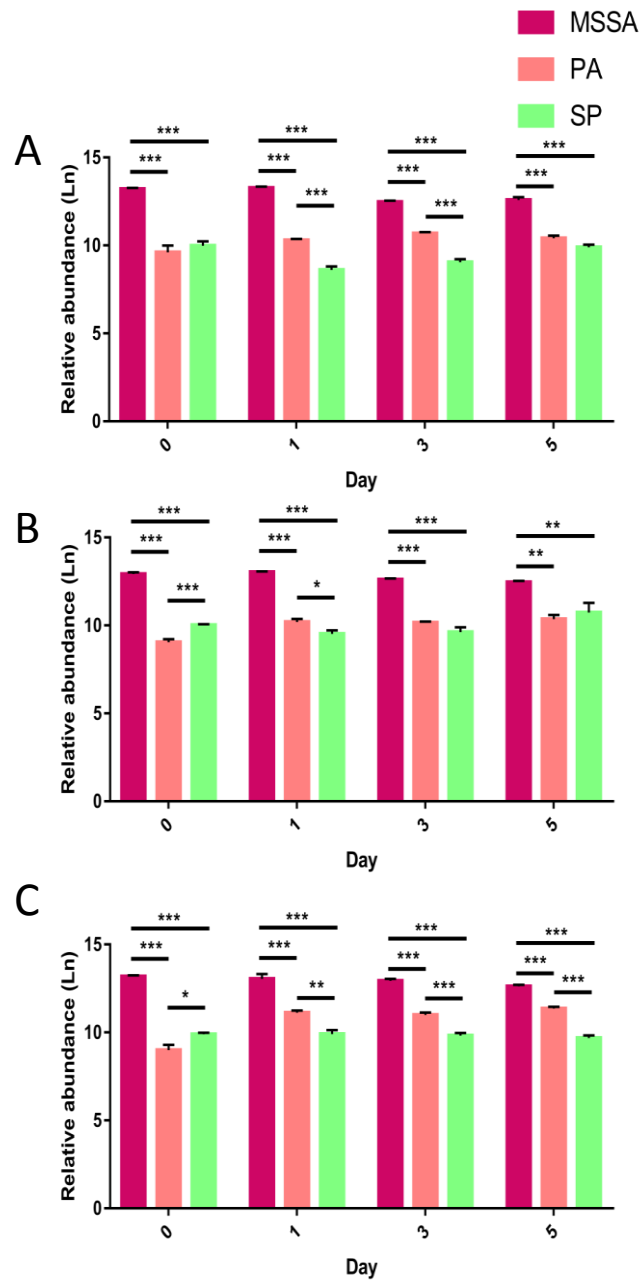

**Figure S8. The presence of 3-methyl-1-butanol among bacterial species and in different wound models. (A) *in vitro*; (B) *ex vivo* incisional; and (C) *ex vivo* excisional wound model.** Relative abundance of 3-methyl-1-butanol on days 0, 1, 3 and 5 produced by MSSA (pink), PA (peach) and SP (green) biofilms. Mean  $\pm$  standard error of the mean (n=6). \* P < 0.05, \*\* P < 0.01, \*\*\* P < 0.001, as determined by one-way analysis of variances with accompanying Tukey post hoc analyses.

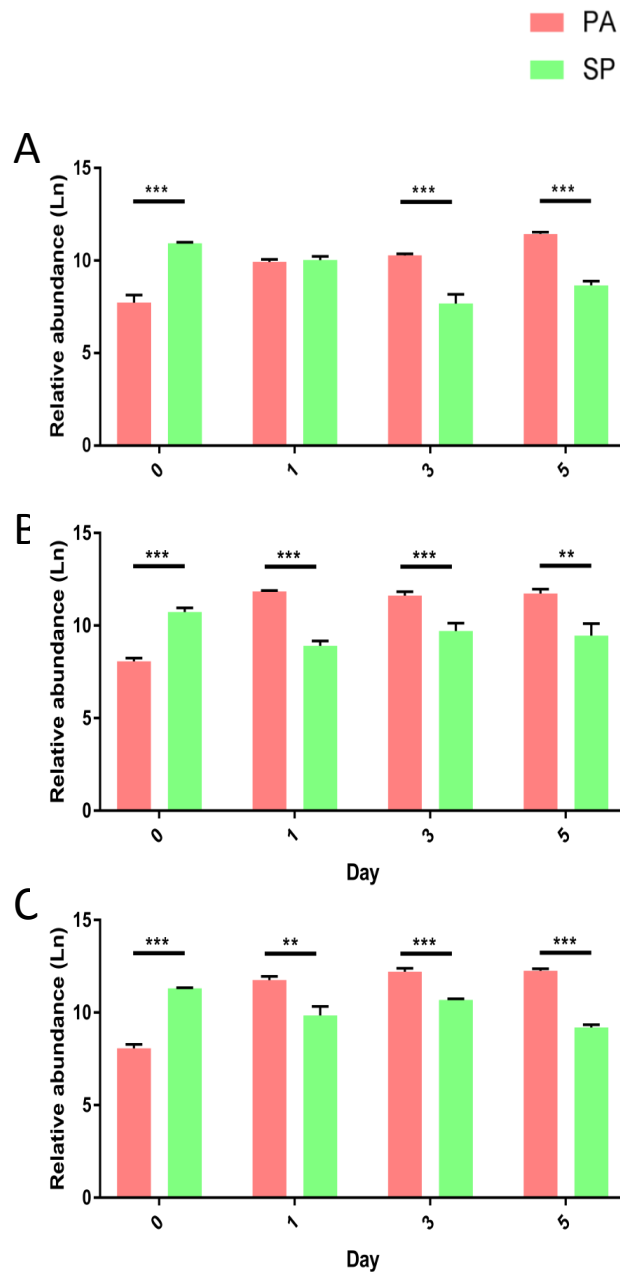

**Figure S9. The presence of 1-undecene among bacterial species and in different wound models (except MSSA). (A) *in vitro*; (B) *ex vivo* incisional; and (C) *ex vivo* excisional wound model. Relative abundance of 1-undecene on days 0, 1, 3 and 5 produced by PA (peach) and SP (green) biofilms. Mean  $\pm$  standard error of the mean (n=6), \* P < 0.05, \*\* P < 0.01, \*\*\* P < 0.001, as determined by one-way analysis of variances with accompanying Tukey post hoc analyses.**

MSSA

*In vitro*

Incisional

Excisional

2-methyl-1-propanol

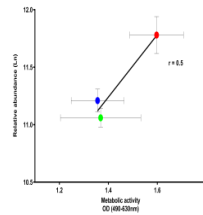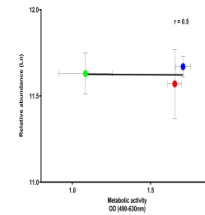

3-methyl-1-butanol

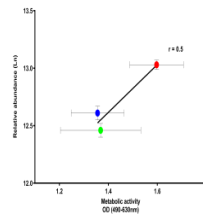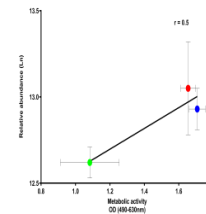

PA

Hydrogen cyanide

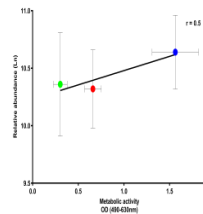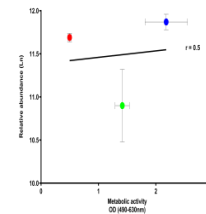

2-methyl-1-propanol

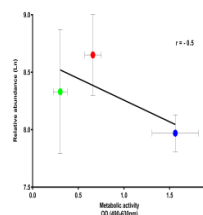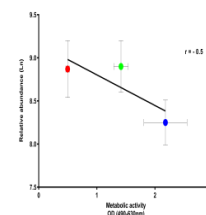

5-methyl-2-heptanamine

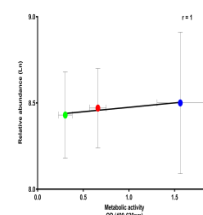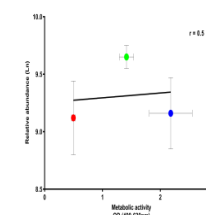

3-methyl-1-butanol

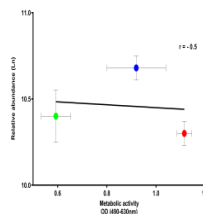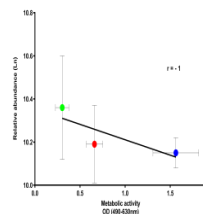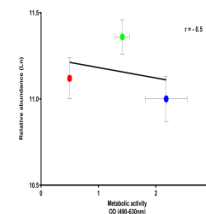

**Figure S10. Correlations between biofilm metabolic activity and abundance of VOCs across models on day 1 (red), 3 (blue) and 5 (green). Mean  $\pm$  SEM (n=6).**

**MSSA**

*In vitro*

**Incisional**

**Excisional**

**3-methyl-1-butanol**

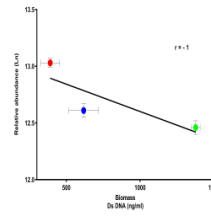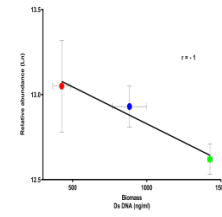

**PA**

**Hydrogen cyanide**

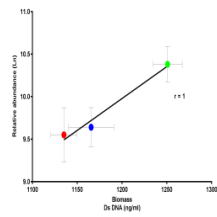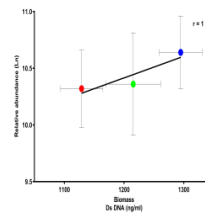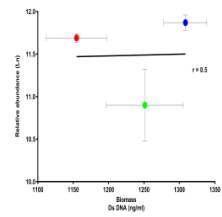

**2-methyl-1-propanol**

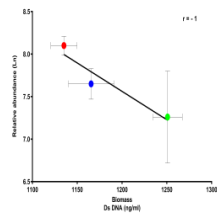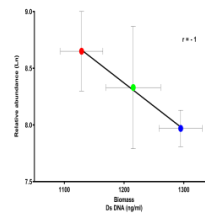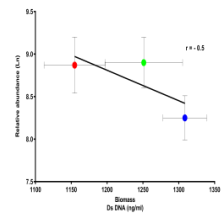

**5-methyl-2-heptanamine**

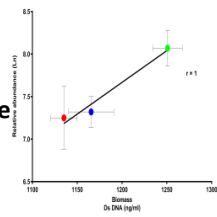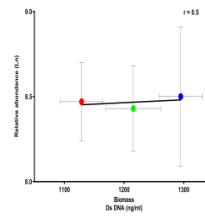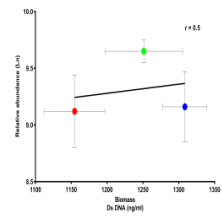

**3-methyl-1-butanol**

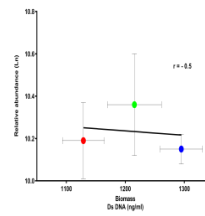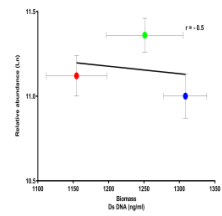

**2-nonanone**

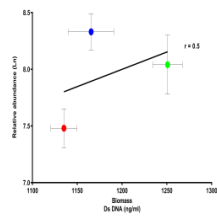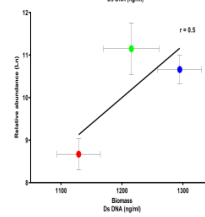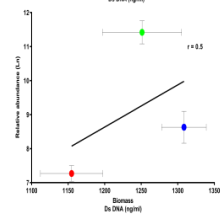

**Figure S11. Correlations between biofilm biomass and abundance of VOCs across models on day 1 (red), 3 (blue) and 5 (green). Mean  $\pm$  SEM (n=6).**

**Table S1.** Proposed chemical compound of the peaks identified by GC-MS based on National Institute of Standards and Technology library spectral matching (spectra of all three species combined).

| Peak | Proposed compound      | Match | R. Match | RI   | Prob (%) |
|------|------------------------|-------|----------|------|----------|
| 1    | 3-methylbutanal        | 818   | 870      | 652  | 69.0     |
| 2    | ethanol                | 831   | 901      | 427  | 93.3     |
| 3    | pentanal               | 858   | 881      | 699  | 35.2     |
| 4    | 2-butanol              | 671   | 724      | 598  | 8.3      |
| 5    | hydrogen cyanide       | 857   | 961      | 300  | 99.0     |
| 6    | 2-methyl-1-propanol    | 819   | 852      | 625  | 88.5     |
| 7    | 5-methyl-2-hexanamine  | 657   | 827      |      | 44.1     |
| 8    | 5-methyl-2-heptanamine | 669   | 715      |      | 7.28     |
| 9    | 1-undecene             | 873   | 874      | 1091 | 7.8      |
| 10   | 3-methyl-1-butanol     | 912   | 918      | 736  | 67.0     |
| 11   | 2-nonanone             | 915   | 917      | 1092 | 76.4     |
| 12   | 2-undecanone           | 914   | 922      | 1294 | 80.7     |

R. Match – reverse match; RI – retention index; Prob – probability

**Table S2.** VOCs identified from biofilms of different bacterial species in the *in vitro* model indicating the statistical differences between time point measurements

| VOC                    | D0 vs. D1 | D0 vs. D3 | D0 vs. D5 | D1 vs. D3 | D1 vs. D5 | D3 vs. D5 |
|------------------------|-----------|-----------|-----------|-----------|-----------|-----------|
| <b>MSSA</b>            |           |           |           |           |           |           |
| 3-methylbutanal        | > 0.05    | < 0.001   | < 0.001   | < 0.001   | < 0.001   | > 0.05    |
| pentanal               | 0.001     | < 0.001   | < 0.001   | < 0.001   | < 0.001   | > 0.05    |
| 2-methyl-1-propanol    | > 0.05    | 0.006     | < 0.001   | > 0.05    | 0.005     | > 0.05    |
| 3-methyl-1-butanol     | > 0.05    | < 0.001   | 0.002     | < 0.001   | 0.001     | > 0.05    |
| <b>PA</b>              |           |           |           |           |           |           |
| hydrogen cyanide       | < 0.001   | < 0.001   | < 0.001   | > 0.05    | > 0.05    | > 0.05    |
| 2-methyl-1-propanol    | > 0.05    | 0.007     | 0.001     | > 0.05    | > 0.05    | > 0.05    |
| 5-methyl-2-hexanamine  | < 0.001   | < 0.001   | < 0.001   | 0.004     | < 0.001   | < 0.001   |
| 5-methyl-2-heptanamine | < 0.001   | < 0.001   | < 0.001   | > 0.05    | > 0.05    | > 0.05    |
| 1-undecene             | < 0.001   | < 0.001   | < 0.001   | > 0.05    | 0.001     | 0.009     |
| 3-methyl-1-butanol     | > 0.05    | 0.01      | > 0.05    | > 0.05    | > 0.05    | > 0.05    |
| 2-nonanone             | < 0.001   | < 0.001   | < 0.001   | 0.012     | > 0.05    | > 0.05    |
| <b>SP</b>              |           |           |           |           |           |           |
| ethanol                | < 0.001   | < 0.001   | < 0.001   | < 0.001   | < 0.001   | > 0.05    |
| 2-butanol              | < 0.001   | < 0.001   | < 0.001   | < 0.001   | < 0.001   | > 0.05    |
| 2-methyl-1-propanol    | 0.001     | < 0.001   | 0.03      | > 0.05    | > 0.05    | 0.022     |
| 1-undecene             | > 0.05    | < 0.001   | < 0.001   | < 0.001   | 0.016     | > 0.05    |
| 3-methyl-1-butanol     | < 0.001   | 0.013     | > 0.05    | > 0.05    | 0.001     | 0.025     |

P values (one-way analysis of variances with accompanying Tukey post hoc analyses); D0 – planktonic phase; D 1, 3 and 5 – biofilm phase (days)

**Table S3.** VOCs identified from biofilms of different bacterial species in the *ex vivo* human cutaneous incisional model indicating the statistical differences between time points

| VOC                    | D0 vs. D1    | D0 vs. D3    | D0 vs. D5    | D1 vs. D3    | D1 vs. D5    | D3 vs. D5 |
|------------------------|--------------|--------------|--------------|--------------|--------------|-----------|
| <b>MSSA</b>            |              |              |              |              |              |           |
| 3-methylbutanal        | < 0.001      | < 0.001      | < 0.001      | > 0.05       | > 0.05       | > 0.05    |
| pentanal               | < 0.001      | < 0.001      | < 0.001      | > 0.05       | > 0.05       | > 0.05    |
| 2-methyl-1-propanol    | > 0.05       | > 0.05       | <b>0.015</b> | <b>0.021</b> | <b>0.003</b> | > 0.05    |
| 3-methyl-1-butanol     | > 0.05       | <b>0.019</b> | <b>0.001</b> | <b>0.001</b> | < 0.001      | > 0.05    |
| <b>PA</b>              |              |              |              |              |              |           |
| hydrogen cyanide       | < 0.001      | < 0.001      | < 0.001      | > 0.05       | > 0.05       | > 0.05    |
| 2-methyl-1-propanol    | > 0.05       | > 0.05       | > 0.05       | > 0.05       | > 0.05       | > 0.05    |
| 5-methyl-2-hexanamine  | < 0.001      | < 0.001      | < 0.001      | > 0.05       | > 0.05       | > 0.05    |
| 5-methyl-2-heptanamine | < 0.001      | < 0.001      | < 0.001      | > 0.05       | > 0.05       | > 0.05    |
| 1-undecene             | < 0.001      | < 0.001      | < 0.001      | > 0.05       | > 0.05       | > 0.05    |
| 3-methyl-1-butanol     | <b>0.001</b> | <b>0.001</b> | < 0.001      | > 0.05       | > 0.05       | > 0.05    |
| 2-nonanone             | < 0.001      | < 0.001      | < 0.001      | <b>0.009</b> | <b>0.001</b> | > 0.05    |
| 2-undecanone           | < 0.001      | < 0.001      | < 0.001      | > 0.05       | > 0.05       | > 0.05    |
| <b>SP</b>              |              |              |              |              |              |           |
| ethanol                | < 0.001      | < 0.001      | < 0.001      | > 0.05       | > 0.05       | > 0.05    |
| 2-butanol              | < 0.001      | < 0.001      | < 0.001      | > 0.05       | > 0.05       | > 0.05    |
| 2-methyl-1-propanol    | > 0.05       | > 0.05       | > 0.05       | > 0.05       | <b>0.01</b>  | > 0.05    |
| 1-undecene             | <b>0.03</b>  | > 0.05       | > 0.05       | > 0.05       | > 0.05       | > 0.05    |
| 3-methyl-1-butanol     | > 0.05       | > 0.05       | > 0.05       | > 0.05       | > 0.05       | > 0.05    |

P values (one-way analysis of variances with accompanying Tukey post hoc analyses); D0 – planktonic phase; D 1, 3 and 5 – biofilm phase (days)

**Table S4.** VOCs identified from biofilms of different bacterial species in the *ex vivo* human cutaneous excisional model indicating the statistical differences between time points

| VOC                    | D0 vs. D1    | D0 vs. D3    | D0 vs. D5 | D1 vs. D3    | D1 vs. D5    | D3 vs. D5    |
|------------------------|--------------|--------------|-----------|--------------|--------------|--------------|
| <b>MSSA</b>            |              |              |           |              |              |              |
| 3-methylbutanal        | < 0.001      | < 0.001      | < 0.001   | > 0.05       | > 0.05       | > 0.05       |
| pentanal               | < 0.001      | < 0.001      | < 0.001   | > 0.05       | > 0.05       | > 0.05       |
| 2-methyl-1-propanol    | > 0.05       | > 0.05       | > 0.05    | > 0.05       | > 0.05       | > 0.05       |
| 3-methyl-1-butanol     | > 0.05       | > 0.05       | > 0.05    | > 0.05       | > 0.05       | > 0.05       |
| <b>PA</b>              |              |              |           |              |              |              |
| hydrogen cyanide       | < 0.001      | < 0.001      | < 0.001   | > 0.05       | > 0.05       | <b>0.024</b> |
| 2-methyl-1-propanol    | > 0.05       | > 0.05       | > 0.05    | > 0.05       | > 0.05       | > 0.05       |
| 5-methyl-2-hexanamine  | < 0.001      | < 0.001      | < 0.001   | <b>0.017</b> | <b>0.039</b> | > 0.05       |
| 5-methyl-2-heptanamine | < 0.001      | < 0.001      | < 0.001   | > 0.05       | > 0.05       | > 0.05       |
| 1-undecene             | < 0.001      | < 0.001      | < 0.001   | > 0.05       | > 0.05       | > 0.05       |
| 3-methyl-1-butanol     | < 0.001      | < 0.001      | < 0.001   | > 0.05       | > 0.05       | > 0.05       |
| 2-nonanone             | < 0.001      | < 0.001      | < 0.001   | <b>0.028</b> | < 0.001      | < 0.001      |
| 2-undecanone           | < 0.001      | < 0.001      | < 0.001   | > 0.05       | > 0.05       | > 0.05       |
| <b>SP</b>              |              |              |           |              |              |              |
| ethanol                | <b>0.001</b> | > 0.05       | < 0.001   | < 0.001      | < 0.001      | < 0.001      |
| 2-butanol              | < 0.001      | <b>0.011</b> | < 0.001   | < 0.001      | < 0.001      | < 0.001      |
| 2-methyl-1-propanol    | > 0.05       | > 0.05       | > 0.05    | > 0.05       | > 0.05       | > 0.05       |
| 1-undecene             | <b>0.004</b> | > 0.05       | < 0.001   | > 0.05       | > 0.05       | <b>0.003</b> |
| 3-methyl-1-butanol     | > 0.05       | > 0.05       | > 0.05    | > 0.05       | > 0.05       | > 0.05       |

P values (one-way analysis of variances with accompanying Tukey post hoc analyses); D0 – planktonic phase; D 1, 3 and 5 – biofilm phase (days)
